1 **Genetic and gene expression analysis of flowering time regulation by light quality in lentil**

2

3 Hai Ying Yuan<sup>1</sup>, Carolyn T. Caron<sup>1</sup>, Larissa Ramsay<sup>1</sup>, Richard Fratini<sup>2</sup>, Marcelino Pérez de la  
4 Vega<sup>2</sup>, Albert Vandenberg<sup>1</sup>, James L. Weller<sup>3</sup>, Kirstin E. Bett<sup>1\*</sup>

5 <sup>1</sup> Department of Plant Sciences, University of Saskatchewan, Saskatoon SK S7N 5A8, Canada

6 <sup>2</sup> Area de Genética, Departamento de Biología Molecular, Universidad de León, León, Spain

7 <sup>3</sup> School of Biological Sciences, University of Tasmania, Hobart, Tasmania, Australia

8 \*Correspondence: k.bett@usask.ca

9

10 **Abstract**

11 Flowering time is important due to its roles in adaptation to different environments and  
12 subsequent formation of crop yield. Changes in light quality affect a range of developmental  
13 processes including flowering time, however little is known about light quality induced flowering  
14 time control in lentil. This study aims to investigate the genetic basis for differences in flowering  
15 response to light quality in lentil.

16 We explored variation in flowering time caused by changes in red/far-red related light quality  
17 environments of a lentil interspecific recombinant inbred line population developed from a cross  
18 between *Lens culinaris* cv. Lupa and *L. orientalis* accession BGE 016880. A genetic linkage map  
19 was constructed and then used for identifying QTL associated with flowering time regulation  
20 under different light quality environments. Differential gene expression analysis through  
21 transcriptomic study and RT-qPCR were used to identify potential candidate genes.

22 QTL mapping located 13 QTLs controlling flower time under different light quality  
23 environments, with phenotypic variance explained ranging from 1.7 to 62.9%. Transcriptomic  
24 profiling and gene expression analysis for both parents of this interspecific RIL population

25 identified flowering-related genes showing environment-specific differential expression  
26 (flowering DEGs). One of these, a member of the florigen gene family FTa1 (*LcFTa1*) was  
27 located close to 3 major QTLs. Furthermore, gene expression results suggests two other florigen  
28 genes (*LcFTb1* and *LcFTb2*), MADS-box transcription factors like *LcAGL6/13d*, *LcSVPb*,  
29 *LcSOC1b* and *LcFULb*, as well as bHLH transcription factor *LcPIF6* and Gibberellin 20 oxidase  
30 *LcGA20oxC,G*, may be involved in the light quality response as well.  
31 Our results show that a major component of flowering time sensitivity to light quality is tightly  
32 linked to *LcFTa1* and associated with changes in its expression. This work provides a foundation  
33 for crop improvement of lentil with better adaptation to variable light environments.

34

35 **Keywords:** Flowering time, Light quality, R/FR, QTL analysis, RNAseq, Transcriptome,  
36 Differential gene expression, *Lens culinaris*, *Lens orientalis*

37

## 38 INTRODUCTION

39 Flowering, a transition from vegetative growth to reproductive growth is one of the most  
40 important events for flowering plants. The switch from vegetative to reproductive growth is  
41 essential for crop production when seeds or fruits are to be the end products. Plants need to  
42 recognize and process a wide range of environmental and internal cues, and then consolidate  
43 these into a single effective developmental choice: to flower or not (Putterill *et al.*, 2004). Some  
44 of the main environmental factors that control flowering time include photoperiod and  
45 temperature, but light quality is also known to have an important influence (Adams *et al.*, 2009;  
46 Casal, 2013), and acts as a crucial signal that communicates the close presence of neighbouring  
47 plants (Adams *et al.*, 2009). One of the main components of this signal is a reduction in the red to  
48 far-red ratio (R/FR) which results from the selective absorption of red wavelengths by

49 chlorophyll (Smith and Whitelam, 1997). This reduction in R/FR is primarily sensed through the  
50 phytochrome family of photoreceptors, which mediate its effects on a wide range of  
51 developmental processes, including increased stem elongation, reduced branching and  
52 accelerated flowering (Smith and Whitelam, 1997; Quail, 2002; Kami *et al.*, 2010).

53 Studies of flowering time control have identified numerous flowering time genes and defined  
54 genetic regulatory networks in model species (Song *et al.*, 2015; Hori *et al.*, 2016; Gol *et al.*,  
55 2017), as well as in some legumes (Weller and Ortega, 2015; Ridge *et al.*, 2017; Ortega *et al.*,  
56 2019; Lin *et al.*, 2020). Many of these genes contribute to the natural genetic variation for  
57 flowering time and for related growth and yield traits, and provide adaptation of crop plants to  
58 various locations and management practices (Jung and Müller, 2009; Bouchet *et al.*, 2013;  
59 BlüMel *et al.*, 2015). The importance and genetic basis of variation in response to light quality  
60 specifically is relatively poorly understood in many crop species, although many of the genes  
61 defined in *Arabidopsis* are widely conserved (Hecht *et al.*, 2005; Adams *et al.*, 2009; Leijten *et*  
62 *al.*, 2018).

63 A genetic understanding of flowering time regulation is an important general objective in plant  
64 breeding, as it facilitates the generation of new varieties that will be better adapted to a specific  
65 environment. Genetic analysis of flowering time has been conducted in many legume crops  
66 (Pérez-Vega *et al.*, 2010; Cruz-Izquierdo *et al.*, 2012; Upadhyaya *et al.*, 2015; Liu *et al.*, 2016;  
67 Ridge *et al.*, 2017), including lentil (Sarker *et al.*, 1999; Fratini *et al.*, 2007; Tullu *et al.*, 2008;  
68 Fedoruk *et al.*, 2013). However, few studies so far have investigated the genetic basis for  
69 flowering responses to light quality, and none in lentil.

70 Cultivated lentil (*Lens culinaris* Medik.) is the third most important cool-season grain legume  
71 (FAO, 2015). Lentils have high nutritional and health benefits, and like other crop legumes, play  
72 a significant role in supporting environmentally sustainable agriculture due to their nitrogen

73 fixation ability. In addition to the cultivated lentil, there are six wild species within the genus  
74 *Lens* (Van Oss *et al.*, 1997) and they contain rich genetic diversity that can be used for genetic  
75 improvement of cultivated lentils (Vail *et al.*, 2011; Podder *et al.*, 2013; Bhadauria *et al.*, 2017).  
76 In a recent study, we found that the flowering time of most wild lentil genotypes was not  
77 significantly affected by light quality changes, whereas it was consistently accelerated under the  
78 low R/FR conditions in cultivated lentil (Yuan *et al.*, 2017). This variation in flowering time  
79 sensitivity toward the light quality change indicated that genes or specific alleles associated with  
80 this trait could be used to select or modify flowering time in cultivated lentil.

81 In this study, we used an interspecific recombinant inbred line (RIL) population of lentil  
82 (Fratini *et al.*, 2007) whose parents had contrasting flowering responses to light quality change.  
83 We characterized the variations in flowering responses of individual RILs to contrasting R/FR  
84 environments and used a high-density genetic linkage map to identify QTLs associated with  
85 differential sensitivity to light quality. *De novo* transcriptomic analysis was used to characterize  
86 the effects of light quality on gene expression, and together with the newly available *L. culinaris*  
87 genome (CDC Redberry, v 2.0) (Ramsay *et al.*, 2019), hereby referred to as the reference  
88 genome, we were able to identify and evaluate potential candidate genes for this important  
89 response.

90

## 91 **MATERIALS AND METHODS**

### 92 **Plant material, growth conditions and phenotypic evaluation**

93 An interspecific recombinant inbred line (RIL) population developed from a cross between *L.*  
94 *culinaris* cv. Lupa and *L. orientalis* accession BGE 016880 (Fratini *et al.*, 2007) was used in this  
95 study. Both parents have contrasting flowering time responses to light quality change, with the  
96 wild parent being less sensitive (Yuan *et al.*, 2017). The RIL population of 93 individuals and

97 parents were grown and evaluated in two Conviron GR178 walk-in plant growth chambers with  
98 contrasting R/FR ratios, but similar light quantities based on the photosynthetically active  
99 radiation (PAR). The high R/FR light quality condition was the natural condition in the growth  
100 chamber fitted with T5 835 High Output Fluorescence bulbs (Philips, Andover, MA, USA). The  
101 low R/FR light quality condition was reached by adding evenly spaced PfrSpec™ LED light  
102 panels (Fluence Bioengineering, Inc., model RAY44, peak spectrum at 730nm, Austin, Texas,  
103 USA) into the light bank fitted with the T5 835 High Output fluorescent bulbs. The spectral  
104 photon flux and PAR of each light condition was measured using a spectroradiometer (Apogee  
105 Instruments, Model PS-300, Logan, UT, USA). The R and FR values were calculated using the  
106 spectral photon flux at 650–670 and 720–740 nm, respectively (Smith, 1982). The high R/FR  
107 condition had an R/FR ratio of  $7.30 \pm 0.14$  with PAR at  $402.2 \pm 33.6 \mu\text{mol}/\text{m}^2\text{s}$ , and the low  
108 R/FR condition had an R/FR ratio of  $0.19 \pm 0.01$  with a PAR level very close to the high R/FR  
109 condition at  $395.6 \pm 32.9 \mu\text{mol}/\text{m}^2\text{s}$ . The spectral distribution of these two light conditions is  
110 shown in **Supplementary file S1\_Fig. S1A**.

111 Prior to planting, seeds of all RILs and parents were stored at  $-20 \text{ }^\circ\text{C}$  for one week and then the  
112 seed coats were nicked to improve imbibition and germination. Square, 10 cm pots were filled  
113 with growth medium consisting of 50% Sunshine Mix #3 and 50% Sunshine Mix #4 (Sun Gro  
114 Horticulture Canada Ltd., Seba Beach, AB Canada). Two seeds were sown in each pot and  
115 thinned to a single plant after emergence. The RILs and the parents were planted in a completely  
116 randomized design with four technical replicates per genotype under each light quality condition  
117 and the experiment was repeated once. Plants were grown and maintained at  $22 \text{ }^\circ\text{C}/16 \text{ h}$  day and  
118  $16 \text{ }^\circ\text{C}/8 \text{ h}$  night for both conditions and repeats. Days to flower (DTF) were calculated based on  
119 days from emergence to R1 (one open flower at any node) (Erskine *et al.*, 1990). Levene's test of  
120 homogeneity of variance was done for days to flower using R (R Core Team, 2013). There were

121 no significant effects of repeat, so data were averaged over the two repeats. For each individual  
122 the trait “Flowering Time Sensitivity” (FTS) was calculated as the ratio of the difference in DTF  
123 between two conditions divided by the sum of the DTF under two conditions so as to avoid bias  
124 due to the underlying differences in DTF.

$$125 \quad \text{FTS} = (\text{DTF}_{\text{high}} - \text{DTF}_{\text{low}}) / (\text{DTF}_{\text{high}} + \text{DTF}_{\text{low}}).$$

126

### 127 **RADseq library preparation, sequencing and SNP calling**

128 Illumina sequencing libraries were prepared using genomic DNA from the RIL population for  
129 restriction site-associated DNA sequencing (RADseq). HindIII and NlaIII were chosen as two  
130 restriction enzymes to digest the genomic DNA. Detailed library preparation procedures were  
131 described in von Wettberg et al. (von Wettberg *et al.*, 2018). Fragments were sequenced as  
132 single-end 100-bp reads on an Illumina HiSeq4000 at the University of California at Davis  
133 Genome Core Facility. Reads were mapped to the *L. culinaris* v2.0 reference genome using  
134 Bowtie allowing only end-to-end matches (Langmead and Salzberg, 2012). Variant calling was  
135 performed with Samtools (Li *et al.*, 2009) and output in VCF format (Danecek *et al.*, 2011). SNP  
136 Variants were filtered using VCFtools (Danecek *et al.*, 2011) to exclude sites that contain an  
137 indel, keep variants that have no more than 66% missing data with a minimum quality score of  
138 30, and include only bi-allelic sites. After filtering, SNP variants were converted to ABH format,  
139 markers that were 100% identical in sequential order along the chromosome (including missing)  
140 were binned and further filtered for markers where only the parents were different. Initially,  
141 84,721 SNPs were generated from the RIL population and after filtering and binning, 15,686  
142 SNPs were retained for linkage mapping.

### 143 **Linkage map construction and QTL mapping**

144 Linkage map construction was performed with IciMapping software (Meng *et al.*, 2015). BIN  
145 functionality within the software was used to remove redundant SNP markers that have identical  
146 segregation in the RIL population. After binning, SNP markers were grouped using logarithm of  
147 the odds (LOD) threshold value of 8.0. Linkage groups (LGs) were assigned using the genomic  
148 position of SNP markers on the *L. culinaris* v2.0 reference genome (Ramsay *et al.*, 2019). The  
149 REcombination Counting and ORDERing (RECORD) algorithm (Van Os *et al.*, 2005) was used to  
150 order the SNPs within each LG. The Kosambi mapping function (Kosambi, 1943) was used to  
151 convert the recombination fractions into additive genetic distance (centiMorgans). Rippling of the  
152 SNP markers was performed by permutation of a window of 8 markers and using sum of adjacent  
153 recombination frequencies (SARF) as rippling criterion. The linkage map was further adjusted  
154 using the R/qtl package (Broman *et al.*, 2003). The marker order within a linkage group that gave  
155 the shortest genetic distance was chosen as the final map.

156 QTL mapping was performed using BIP functionality in IciMapping software (Meng *et al.*,  
157 2015). For QTL identification, the genotyping data was integrated with the phenotypic data.  
158 Inclusive Composite Interval Mapping of Additive (ICIM-ADD) was used to detect additive  
159 QTL. The walking speed chosen for QTL mapping was 1 cM. A 1000 permutation test was  
160 applied to decide the logarithm of odds (LOD) thresholds ( $P \leq 0.05$ ) to determine the significance  
161 of identified QTLs. A One-LOD support interval was calculated for each QTL to obtain a 95 %  
162 confidence interval. The percentage of phenotypic variance explained by each QTL in proportion  
163 to the total phenotypic variance was estimated and QTLs with a positive or negative additive  
164 effect for the trait imply that the increase in the phenotypic value of the trait is contributed by  
165 alleles from *L. culinaris* cv. Lupa or *L. orientalis* BGE 016880, respectively. QTL for all traits  
166 were named according to McCouch *et al.* (1997) and alphabetical order was used for QTLs on the

167 same linkage group. Linkage map was drawn using LinkageMapView package in R (Ouellette *et*  
168 *al.*, 2018).

### 169 **Transcriptomic analysis and RT-qPCR verification of the candidate genes**

170 Both *L. culinaris* cv. Lupa and *L. orientalis* BGE 016880 were grown under two different  
171 R/FR ratio environments, same as the ones used for RIL population screening. Leaf sample  
172 collections started two weeks after emergence (T1 stage) and continued once a week for five  
173 weeks (T2 to T5 stage). T1 sampling stage was two weeks before *L. orientalis* BGE 016880  
174 flowered under low R/FR environment and **Supplementary file S1\_Figure S2** shows relations  
175 between the sampling stages and the flowering times for both BGE 016880 and Lupa under  
176 different R/FR environments. Samples were taken at the same time of the day for each collection.  
177 Each biological replicate consisted of leaf material collected from three individual plants and  
178 three biological replicates were used.

179 Total RNA was isolated using RNeasy Plant Mini Kit (QIAGEN, Germantown, MD, USA)  
180 according to the protocol provided with the kit. On-column DNase digestion was performed  
181 during the isolation process according to the kit instructions. Extracted RNA was quantified and  
182 qualified using a NanoDrop 8000 UV–Vis spectrophotometer (NanoDrop, Wilmington, DE,  
183 USA) and an Agilent 2100 Bioanalyzer (Agilent Technologies, Santa Clara, CA, USA) using an  
184 Agilent RNA 6000 Nano Assay. RNAseq libraries were constructed using Illumina TruSeq  
185 Stranded mRNA Sample Preparation Kit (Illumina Inc., San Diego, CA, USA) according to the  
186 protocol, and pooled libraries of 20 barcoded samples were sent for pair-end sequencing using an  
187 Illumina HiSeq™ 2500 sequencing platform (Illumina Inc., San Diego, CA, USA).

188 Qualities of the raw reads were checked using FASTQC (Andrews, 2010) and adaptor  
189 sequences were removed using TRIMMOMATIC (Bolger *et al.*, 2014). Trimmed-reads were  
190 used for *de novo* assembly of transcriptome using Trinity (Grabherr *et al.*, 2011). Salmon (Patro



191 *et al.*, 2017) was used to quantify the abundance of transcripts and 3D RNA-seq pipeline (Calixto  
192 *et al.*, 2018; Guo *et al.*, 2019) was used for the analysis of differential gene expression within  
193 species. A detailed method regarding differential gene expression analysis is described in  
194 **Supplementary file S1\_Supplementary Methods**. Genes with FDR adjusted p-values < 0.05 and  
195  $|\log_2FC| \geq 1$  were considered differentially expressed genes (DEGs; FC, Fold change).

196 A list of 244 lentil genes that showed high homology with genes involved in flowering in  
197 *Arabidopsis thaliana* ([https://www.mpipz.mpg.de/14637/Arabidopsis\\_flowering\\_genes](https://www.mpipz.mpg.de/14637/Arabidopsis_flowering_genes) and  
198 (Higgins *et al.*, 2010) and *Medicago truncatula* (Hecht *et al.*, 2005; Putterill *et al.*, 2013) was  
199 curated (**Supplementary File S2**) using in-house BLASTn search  
200 (<https://knowpulse.usask.ca/blast/nucleotide/nucleotide>) against the *L. culinaris* cv. CDC  
201 Redberry v2.0 reference genome. An e-value cut-off of 1e-5 or matched gene annotation in the  
202 lentil genome assembly was used to select the putative homologue. This list was used to explore  
203 the expression of known flowering genes in the lentil genome.

204 To confirm the reliability of RNAseq results, representative flowering-related genes were  
205 chosen for RT-qPCR using FAST SYBR® Green qPCR Master Mix (Applied Biosystems, Foster  
206 City, CA, USA) with a BioRad Real-Time PCR system. Actin (Lcu.2RBY.L011470) was  
207 selected as the reference gene. To derive the relative expression value, the delta-delta CT method  
208 was adopted (Livak and Schmittgen, 2001) and samples from T1 stage at low R/FR light quality  
209 environment were used as reference samples. The sequences of the primers used in qPCR were  
210 listed in supplemental information (**Supplementary file S1\_Table S1**).

211 Data availability

212 The RAD-seq data of the RIL population plus two parents (*L. culinaris* cv. Lupa and *L.*  
213 *orientalis* BGE 016880) as well as the raw RNAseq data from *L. culinaris* cv. Lupa and *L.*  
214 *orientalis* BGE 016880 have been submitted to the NCBI Sequence Read Archive with the IDs as

215 PRJNA693555 and PRJNA693582. Related tables, figures and methods are given in  
216 **Supplementary file S1**. All other related data as well as the in-house developed scripts are given  
217 in **Supplementary files S2 to S6**.

218

## 219 **RESULTS**

### 220 **Variation in flowering time response to light quality**

221 To explore the genetic control of differences in flowering response to light quality we  
222 previously described for wild and domesticated lentil accessions (Yuan *et al.*, 2017), we used a  
223 RIL population developed from an interspecific cross between *L. culinaris* cv. Lupa and an  
224 accession (BGE 016880) of *L. orientalis*, the putative progenitor of cultivated lentil (Mayer and  
225 Soltis, 1994). Flowering time in this population was assessed under two light environments with  
226 equivalent PAR but differing in R/FR (**Supplementary file S1\_Fig. S1A**). We also expressed the  
227 response of each line to light quality as a “flowering time sensitivity” index (FTS), which was  
228 calculated as  $(DTF_{high}-DTF_{low})/(DTF_{high}+DTF_{low})$ , in order to avoid bias due to the underlying  
229 differences in DTF.

230 The wild parent, BGE 016880, flowered significantly earlier than the cultivated parent, Lupa,  
231 under both light quality environments and the wild parent had a low FTS compared to the  
232 cultivated parent ( $P < 0.05$ ; **Figure 1** and **Supplementary file S1\_Fig. S1**). The RIL population  
233 segregated for days to flowering and for sensitivity to change in light quality, with probability  
234 density of the distributions centered on the mid-parent value under both light conditions and  
235 transgressing the parental range in both directions (**Fig. 1**). Some indication of a bimodal  
236 distribution was evident for flowering under high R/FR and for flowering time sensitivity (**Fig.**  
237 **1**), suggesting the possibility of a substantial contribution from a single major locus.

238

## 239 **Linkage map construction**

240 To support QTL analysis of the observed differences, we generated SNP genotyping profiles  
241 for the Lupa x BGE 016880 population through a RADseq approach and used these to generate a  
242 genetic linkage map. A total of 4073 SNP markers were mapped into six linkage groups (LGs;  
243 **Fig. 2A and Supplementary file S3**). These groups were designated LG1 through LG6 in  
244 accordance with their relationship to chromosomes of the reference genome. Markers from  
245 chromosome 7 mapped with those from chromosome 2 in LG2, a pseudo-linkage most likely due  
246 to a chromosomal rearrangement in one parent relative to the other. Rearrangements have  
247 previously been reported in *Lens* interspecies crosses (Ladizinsky, 1979) and are also apparent in  
248 our recent genome assembly efforts across *Lens* species (Ramsay *et al.*, 2019). Respective marker  
249 positions between the linkage map and the reference genome are shown in **Fig. 2B**. A heat map of  
250 pairwise recombination fractions and LOD scores between all pairs of markers was visualized to  
251 check the quality of the linkage map. The tight linkage of the markers within each LG indicated  
252 the reliability of the developed linkage map (**Fig 2C**). The total length of the linkage map  
253 spanned 5923.3 cM with LG2 being the largest and LG1 the smallest. The number of markers per  
254 linkage group varied from 496 in LG1 to 958 in LG2, with an average distance between two  
255 adjacent markers of 1.5 cM and the largest gap at 9.4 cM in LG5 (**Supplementary file S1\_Table**  
256 **S2**).

257

## 258 **Genetic analysis of flowering time and sensitivity to R/FR**

259 We detected six QTLs for flowering time under high R/FR light conditions (*qDTFH-1A*,  
260 *qDTFH-1B*, *qDTFH-3*, *qDTFH-5*, *qDTFH-6A* and *qDTFH-6B*), distributed across four linkage  
261 groups (LG 1, 3, 5, and 6) (**Fig. 3**). Among these, one locus (*qDTFH-6A*) explained the majority  
262 of the variation (63%), with the other five each contributing less than 10% each (**Table 1**). This

263 QTL showed negative additive effect on days to flowering under high R/FR light quality, which  
264 indicated its effect was contributed by the allele from wild parent *L. orientalis* BGE 016880.  
265 Under low R/FR light conditions, we detected only four QTLs for flowering time, across LG1  
266 (*qDTFL-1*) and LG6 (*qDTFL-6A*, *qDTFL-6B*, *qDTFL-6C*) (**Fig. 3**). As in high R/FR conditions,  
267 the overall effect was dominated by one locus (*qDTFL-6A*), which explained 46% of the  
268 variance, with the three other loci contributing between 7 and 15% each (**Table 1**). Once again,  
269 the wild BGE 016880 allele contributed to the effect at this major locus.

270 Analysis of the flowering time response to R/FR (in terms of the FTS index) revealed three  
271 QTLs on LG 2, 3, and 6 (*qFTS-2*, *qFTS-3*, *qFTS-6*) (**Fig. 3**). Locus *qFTS-6* was located in a  
272 similar region of LG6 to *qDTFH-6A* and *qDTFL-6A* and explained 60% of the phenotypic  
273 variance with the contribution from the wild BGE 016880 allele. The other two loci each  
274 explained <10% each.

275 The major locus for each of the three traits (i.e. DTFH, DTFL and FTS) overlapped on LG6  
276 (**Figure 3**), raising the possibility that these three loci might reflect the contribution of a single  
277 underlying gene. Across the three traits, three other pairs of loci showed similar close co-  
278 location: on LG1 (*qDTFH1A* and *qDTFL1*), LG3 (*qDTFH-3* and *qFTS-3*) and LG6 (*qDTFH-6B*  
279 and *qDTFL-6B*), also suggesting a possible common genetic basis for the loci in each pair.  
280 Finally, four of the detected loci (one for each trait) were in unique positions on LG1 (*qDTFH-*  
281 *1B*), LG2 (*qFTS-2*), LG5 (*qDTFH-5*) and LG6 (*qDTFL-6C*). Overall, our analysis across both  
282 light quality conditions revealed a minimum of seven distinct QTLs contributing to the variability  
283 in DTF under these experimental conditions.

284

285 ***De novo* assembly of transcriptome**

286 From what we have done so far based on the genome assemblies of different *Lens* species and  
287 intensive genotyping of intra-, inter-specific lentil RIL populations, we know that genome size  
288 difference exists among *Lens* species and chromosomal rearrangements are common even within  
289 cultivated lentil. BGE 016880 is an accession of *L. orientalis* while Lupa is a Spanish cultivar  
290 (Fratini *et al.*, 2007). To remove bias that could result from using the *L. culinaris* cv. CDC  
291 Redberry reference genome for differential gene expression analysis, we carried out *de novo*  
292 assembly of the transcriptomes from RNAseq data for both BGE 016880 and Lupa.

293 A total of 705.1 MB paired-reads of the transcriptomic data were generated using the Illumina  
294 HiSeq 2500 platform (paired end of 125bp\*2) of which 359.4 MB belonged to *L. orientalis* BGE  
295 016880 and 345.7 MB belonged to *L. culinaris* cv. Lupa (**Supplementary file S4**). After quality  
296 filtering and pre-processing of reads, 97.8% of the reads for both *L. orientalis* BGE 016880 and  
297 *L. culinaris* cv. Lupa were kept for further analysis. These high-quality reads of 30 samples from  
298 five developmental stages were pooled together for *L. orientalis* BGE 016880 and *L. culinaris* cv.  
299 Lupa, respectively, and used for *de novo* transcriptome assembly. Trinity assembler generated  
300 138108 transcripts (78707 raw genes) with N50 of 2255bp for *L. orientalis* BGE 016880, and  
301 135723 transcripts (76595 raw genes) with N50 of 2252bp for *L. culinaris* cv. Lupa.  
302 (**Supplementary file S1\_Table S3**).

303

#### 304 **Differential gene expression analysis**

305 *De novo* assembled transcriptomes of BGE 016880 and Lupa were used to quantify the  
306 abundance of the transcripts for all samples from BGE 016880 and Lupa respectively using  
307 Salmon package (Patro *et al.*, 2017). 3D RNA-seq pipeline (Calixto *et al.*, 2018; Guo *et al.*,  
308 2019) was then used for the analysis of differential gene expression and a detailed method can be  
309 found in **Supplementary file S1\_Supplementary\_Methods**.

310 A total of 2573 differentially expressed genes (DEGs) and 1367 DEGs were obtained from the  
311 contrast sets between the low R/FR light environment and high R/FR environment for five  
312 different growth stages of *L. orientalis* BGE 016880 and *L. culinaris* cv. Lupa (**Supplementary**  
313 **file S5**). Out of the 2573 DEGs from BGE 016880, 933, 1061, 64, 139 and 376 DEGs were  
314 observed in T1, T2, T3, T4, and T5 stage, respectively (**Supplementary file S1\_Figure S3A**).  
315 Out of the 1367 DEGs from Lupa, 434, 84, 232, 362 and 255 DEGs were observed in these five  
316 stages, respectively (**Supplementary file S1\_Figure S3B**). Up and down-regulated genes at  
317 these five stages were quite different for both *L. orientalis* BGE 016880 and *L. culinaris* cv. Lupa  
318 (**Fig. 4**), however most DEGs were identified about 2 weeks before flowering which corresponds  
319 to the transition from vegetative growth to reproductive growth for both BGE 016880 and Lupa.  
320 When samples from the five development stages were pooled together to look at the DEGs  
321 between low R/FR and high R/FR light quality, 297, and 156 were identified from *L. orientalis*  
322 BGE 016880 and *L. culinaris* cv. Lupa, respectively (**Supplementary file S5**). Differentially  
323 expressed genes in *L. orientalis* BGE 016880 were almost double compared to those in *L.*  
324 *culinaris* cv. Lupa between low R/FR and high R/FR light quality environments.

325

### 326 **Identification of flowering DEGs**

327 We further examined the DEGs for possible functional links to flowering time regulation. To  
328 do this, we used the list of 244 lentil genes that we curated based on the reference genome  
329 (**Supplementary file S2**) and examined their representation within the DEG set using a custom  
330 Perl script (**Supplementary file S6**). This analysis identified a total of 82 genes as candidate  
331 flowering-related genes among the DEG sets identified for *L. orientalis* BGE 016880 and 62  
332 from the *L. culinaris* cv. Lupa DEG sets. The number of flowering-related DEGs associated with  
333 each of the five development stages were as follows: T1- 15, T2 - 24, T3 - 13, T4 - 12 and T5 -

334 18 for BGE 016880. When sorting flowering-related DEGs within the development stages for  
335 Lupa, we saw the following numbers: T1 - 10, T2 - 4, T3 - 15, T4 - 17 and T5 - 16. Flowering-  
336 related DEGs again showed stage specific regulation in both BGE 016880 and Lupa.

337 Since the flowering times for both BGE 016880 and Lupa were significantly different and  
338 spread from 27 to 60 days after emergence (**Supplementary file S1\_Fig. S1**), we decided to look  
339 at flower DEGs from the DEG set of samples from five development stages, instead of any single  
340 stage, to understand the flower time regulation between low R/FR and high R/FR light quality  
341 environments. 17 flower DEGs were identified in both BGE 016880 and Lupa, out of 297 and  
342 156 DEGs respectively. Of these, 12 were common to both BGE 016880 and Lupa, while five  
343 others were unique to DEG set for one or the other line (**Table 2**).

344

#### 345 **Verification of flowering DEGs through RT-qPCR**

346 We next validated results from RNAseq analysis by RT-qPCR, for selected genes including  
347 Flowering DEGs in the QTL regions, non-DEG flowering genes within the QTL regions, and  
348 flowering DEGs that were not within QTL regions. From the subsets of flowering-related DEGs,  
349 we selected five genes that were located within or nearby the QTL confidence intervals (**Table**  
350 **2**). The major loci *qDTFH-6A*, *qDTFL-6A* and *qFTS-6* in the central region of LG6 co-located  
351 with three *FT* homologs: *LcFTa1*, *LcFTa2* and *LcFTc* (Lcu.2RBY.6g043850,  
352 Lcu.2RBY.6g043870, Lcu.2RBY.6g043940), and a light-regulated transducin/WD-like repeat-  
353 protein (LWD) gene ortholog *LcLWD1* (Lcu.2RBY.6g043520). Of these, *LcFTa1* was the only  
354 one represented in the DEG set in the wild parent, but not in the cultivated parent. Another cluster  
355 of *FT* homologs *LcFTb1* and *LcFTb2* (Lcu.2RBY.6g000730 and Lcu.2RBY.6g000760) were  
356 located near the *qDTFH-6B* and *qDTFL-6B* loci at the top of LG6. A MADS-box gene in the  
357 *AGAMOUS-LIKE 6* (AGL6) clade (Lcu.2RBY.1g040350/ *LcAGL6/13d*) was the closest

358 flowering-related DEG to the loci *qDTFH-1A* and *qDTFL-1*. We also selected one gene *LcELF4a*  
359 (*Lcu.2RBY.3g037650*), a flowering-related DEG not located within or nearby any QTL region.

360 The results were consistent with, and further supported our RNAseq results (**Fig. 5**). For the  
361 major QTL region in the middle of LG6, we confirmed the strong upregulation of *LcFTa1* in  
362 response to low R/FR in *L. orientalis* BGE 016880 but not in *L. culinaris* cv. Lupa. In the same  
363 region, *LcLWD1* and *LcFTa2* had lower (or no) expression in *L. orientalis* BGE 016880, but  
364 similar expression level in *L. culinaris* cv. Lupa under different light quality environments,  
365 whereas *LcFTc* expression was unaffected by R/FR (**Fig. 5**). For the QTL region at the top of  
366 LG6, the DEGs *FTb1* and *FTb2* showed consistent increased expression under low R/FR light  
367 quality in both *L. orientalis* BGE 016880 and *L. culinaris* cv. Lupa. *LcELF4a* was not within or  
368 nearby any QTL region, however, it was identified as a flowering DEG and RT-qPCR result also  
369 supported this. This could mean that additional loci with small effects were not identified, a  
370 common limitation of QTL mapping (Myles and Wayne, 2008).

371

## 372 **DISCUSSION**

373 Optimization of seed yield and reproductive success in nature and in agriculture depends to a  
374 large extent on the appropriate seasonal control of flowering. (Jung and Müller, 2009). Light is an  
375 important daily, seasonal and spatial variable for plants, and flowering time is not only affected  
376 by light duration (photoperiod), but also by light quality (Adams *et al.*, 2009; Casal, 2013). In  
377 particular a reduction in R/FR occurs in light reflected from green plant tissue, provides cues  
378 about prospective competition from neighbouring plants, and leads to a set of morphological  
379 responses including an acceleration of flowering (Whitelam and Devlin, 1997). We have  
380 previously reported species and genotype differences in response to light quality changes within



381 the genus *Lens*, where wild lentils seemed to be less sensitive than cultivated types and therefore  
382 may perform better under variable light quality (Yuan *et al.*, 2017).

383 The parents of the interspecific RIL population used in this study have contrasting flowering  
384 responses to changes in light quality, with the wild parent, BGE 016880, being less sensitive to  
385 changes than is the cultivated parent, Lupa. As expected, the RILs within the population  
386 exhibited segregation for flowering time under different light quality environments, as well as  
387 flowering time sensitivity towards different light qualities. The presence of less sensitive RILs  
388 than the wild parent BGE 016880, and more sensitive RILs than the cultivated parent, suggests  
389 that alleles from both parents have contributed to the response and rearrangement of alleles lead  
390 to transgressive segregation in the RIL population.

391 In our current study, 4073 SNP markers were distributed across 6 linkage groups with an  
392 average marker density of 1.5 cM. The physical size of the lentil genome is estimated to be 4086  
393 Mb (Arumuganathan and Earle, 1991). Based on the distance of the map developed in this study,  
394 an average of 0.69 Mb/cM was covered. Some similar linkage maps generated in lentil RIL  
395 populations had average coverages of 5.9 Mb/cM (Fedoruk *et al.*, 2013), 2.13-3.14 Mb/cM  
396 (Sudheesh *et al.*, 2016) or 1.01 Mb/cM (Ates *et al.*, 2016) using SNP markers generated from  
397 other approaches. It appears that the amount of RADseq-generated SNP markers used in the  
398 current map may help to improve coverage of the lentil genome.

399 There are few reports on flowering time related QTL studies in lentil, and most have used  
400 different marker systems, making it difficult to find consensus across studies (Sarker *et al.*, 1999;  
401 Fratini *et al.*, 2007; Tullu *et al.*, 2008; Fedoruk *et al.*, 2013). So far, there have been no reported  
402 studies on the genetics behind flowering time and light quality change in lentil, although the  
403 identity of the major Sn locus as an ortholog of the circadian clock gene ELF3a (Sarker *et al.*,  
404 1999; Weller *et al.*, 2012) suggests a possible influence on both photoperiod and light quality

405 sensitivity (Jiménez-Gómez *et al.*, 2010; Weller *et al.*, 2012). In our current study, thirteen QTLs  
406 were identified in the RIL population for days to flowering under high R/FR light quality, days to  
407 flowering under low R/FR light quality, and flowering time sensitivity towards light quality  
408 change.

409 Studies using comparative genetics as well as functional genomics have shown that most major  
410 flowering time genes are well conserved between *Arabidopsis* and a large range of crop species  
411 including legumes (Hecht *et al.*, 2005; Roux *et al.*, 2006; Kim *et al.*, 2013; Weller and Ortega,  
412 2015). Using in-house curated 244 lentil homologs of *Arabidopsis thaliana* and *Medicago*  
413 *truncatula* flowering related genes, we were able to look at the corresponding QTL regions in the  
414 lentil reference genome and associated them with flower DEGs. Three major QTLs identified in  
415 the study were within a similar region in the middle of LG6, where a tandem array of florigen  
416 (FT) genes: *LcFTa1*, *LcFTa2* and *LcFTc*, as well as a light-regulated transducin/WD-like repeat-  
417 protein (*LcLWDI*), are located, although only one (*LcFTa1*) showed significant differential  
418 expression within the region. These three QTLs explained more than 45% phenotypic variance  
419 respectively and were in a region syntenic with a section of *Medicago* chromosome 7 and pea  
420 linkage group V, containing a similar tandem array of *FTa1*, *FTa2* and *FTc* genes (Hecht *et al.*  
421 2005, Weller and Ortega, 2015). This region is related to control of flowering time in several  
422 temperate legumes, including pea (Hecht *et al.*, 2011), *M. truncatula* (Laurie *et al.*, 2011), faba  
423 bean (Cruz-Izquierdo *et al.*, 2012), narrow-leafed lupin (Nelson *et al.*, 2017), and chickpea  
424 (Ortega *et al.*, 2019). When *de novo* assembled transcriptomes of *L. orientalis* BGE016880 and  
425 *L. culinaris* cv. Lupa were aligned with our reference genome, the *LcFTa2* transcript could not be  
426 detected in *L. orientalis* BGE016880, implying a possible deletion, and suggesting that this gene  
427 is not likely to be involved in the response to changes in light quality in this interspecific RIL  
428 population. Interestingly, a similar deletion was also observed to associate with a QTL conferring

429 early flowering in chickpea (Ortega *et al.*, 2019), but was also not considered likely to explain the  
430 effect, in view of the generally promotive effects of *FT* genes on flowering (Laurie *et al.*, 2011;  
431 Hecht *et al.*, 2011).

432 Another cluster of QTLs in a distinct region at the top of LG6 was shown to co-locate with two  
433 other differentially expressed flowering genes, the florigen genes *LcFTb1* and *LcFTb2*. In both  
434 pea and Medicago, orthologs of these genes have also been implicated in flowering time control  
435 through genetic and gene expression studies (Laurie *et al.*, 2011; Hecht *et al.*, 2011; Ridge *et al.*,  
436 2017; Putterill *et al.*, 2019; Jaudal *et al.*, 2020). As a flowering pathway integrator, Flowering  
437 Locus T genes promote the transition to flowering and play a key role in plant adaptation and  
438 crop improvement (Wickland and Hanzawa, 2015). In the related temperate legume subterranean  
439 clover, *FTb2* has also been implicated in the acceleration of flowering by low R/FR through gene  
440 expression studies (Pazos-Navarro *et al.*, 2018).

441 Two other QTLs identified were within the same region on LG1 where Agamous-like MADS-  
442 box protein *AGL6/13d* (*LcAGL6/13d*) was the sole flowering-related DEG. *AGL6* represents a  
443 subfamily of MADS-box transcription factor genes and have various roles regarding flowering  
444 time and flower development (Dreni and Zhang, 2016). In Arabidopsis, the activation of *AGL6* is  
445 associated with the down-regulation of floral repressor *FLC/MAF* genes, and up-regulation of the  
446 floral promoter *FT* (Yoo *et al.*, 2011). RT-qPCR analysis confirmed that *LcAGL6/13d*  
447 consistently showed high expression under low R/FR light quality compared to high R/FR light  
448 quality in both *L. orientalis* BGE016880 and *L. culinaris* cv. Lupa.

449 FT regulators like Phytochrome Interacting Factors (PIFs) and Short Vegetative Phase (SVP)  
450 target FT promoters and non-coding regions. These regulators were also differentially expressed  
451 in our study. PIFs belong to a class of basic helix-loop-helix (bHLH) transcription factors and are  
452 involved in promoting the transition to flowering by acting upstream of FT and *TWIN SISTER* of

453 *FT* (*TSF*) under low R/FR in Arabidopsis (Galvão *et al.*, 2019). In soybean, *PIF3* has been  
454 identified as a shade-responsive gene through an RNAseq experiment (Horvath *et al.*, 2015).  
455 *SVP*, or Agamous-like MADS-box protein AGL22 is a negative regulator of flowering in  
456 Arabidopsis (Hartmann *et al.*, 2000) and can bind to the promoters of *SOC1* and *FT* for  
457 transcriptional repression (Li *et al.*, 2008). *SVP* expression decreased after a Gibberellin (GA)  
458 treatment, which suggested the involvement of GA on flowering could be partly mediated  
459 through *SVP* (Li *et al.*, 2008). Two other members of MADS-box transcription factor genes,  
460 Suppressor of overexpression of constans 1 (*SOC1*) and FRUITFULL (*FUL*), were also  
461 identified as flowering-related DEGs in our study. As a floral pathway integrator, *SOC1*  
462 (Agamous-like MADS-box protein AGL20) incorporates multiple flowering signals to promote  
463 flowering and can be induced by GA, while repressed by *FLC* and *SVP* in Arabidopsis (Lee and  
464 Lee, 2010). *SOC1* works downstream of *FT* to promote flowering through up-regulation of the  
465 gene *LEAFY*, which links floral induction and floral development. A recent study in *Medicago*  
466 *truncatula* showed that *MtSOC1* genes can be induced by *MtFTa1* gene and function redundantly  
467 to accelerate flowering (Fudge *et al.*, 2018). *FUL*, or Agamous-like MADS-box protein AGL8  
468 has been shown to work together with *SOC1*, while act against the effects of *FLC* and *SVP* to  
469 promote flowering (Balanzà *et al.*, 2014). The subset of flowering-related genes differentially  
470 expressed under low compared to high R/FR light quality was very similar in both *L. orientalis*  
471 BGE016880 and *L. culinaris* cv. Lupa, indicating a high similarity in the underlying regulatory  
472 processes. However, they differed to some extent both in the level of the expression differences  
473 and the stage at which specific differences were detected.

474 Overall, our results from QTL analysis and gene expression point most clearly to *FTa1* as a  
475 probable basis for the observed differences in flowering sensitivity to light quality between *L.*  
476 *orientalis* BGE016880 and *L. culinaris* cv. Lupa. Similar parallel evidence suggests a weaker role

477 for *FTb1/2* genes, and identifies an AGL6/13-like MADS-box transcription factors as a potential  
478 candidate for a third QTL. In addition, the wider gene expression dataset suggests a number of  
479 other genes including MADS box genes *LcSVPb*, *LcSOC1b* and *LcFULb*, the bHLH transcription  
480 factor *LcPIF6*, and genes related to gibberellin synthesis *LcGA20oxC,G*, may be involved in the  
481 light quality response in leaf tissue, either upstream or downstream of *FT* genes (**Fig. 6**). An  
482 important characteristic of the flowering regulatory network is that all signaling pathways  
483 respond to different endogenous and environmental signals but work together through a delicate  
484 and complicated balance to adjust the switch to flower in a changing environment. Our results  
485 suggested that *FT* genes together with various MADS-box and bHLH transcription factors played  
486 an important role in flowering time regulation under different light quality environments. The  
487 identified QTLs and candidate genes provide a foundation for better adaptation to variable light  
488 environments in crop improvement of lentil.

#### 489 **ACKNOWLEDGEMENTS**

490 We acknowledge Ms. Devini De Silva, Ms. Akiko Tomita, Ms. Brianna Jansen and Mr. Ricco  
491 Tindjau for assistance with the technical work. Technical expertise of the Phytotron staff in the  
492 College of Agriculture and Bioresources at the University of Saskatchewan is greatly appreciated.

493

#### 494 **FUNDING**

495 The research was conducted as part of the AGILE project (Application of Genomics to  
496 Innovation in the Lentil Economy), a Genome Prairie managed project funded by Genome  
497 Canada, Western Grains Research Foundation, the Province of Saskatchewan, and the  
498 Saskatchewan Pulse Growers.

499

#### 500 **LITERATURE CITED**

- 501 **Adams S, Allen T, Whitelam GC. 2009.** Interaction between the light quality and flowering  
502 time pathways in Arabidopsis. *Plant Journal* **60**: 257–267.
- 503 **Andrews S. 2010.** *FastQC A Quality Control tool for High Throughput Sequence Data.*  
504 <https://www.bioinformatics.babraham.ac.uk/projects/fastqc/>. 5 Jun. 2020.
- 505 **Arumuganathan K, Earle ED. 1991.** Nuclear DNA Content of Some Important Plant Species  
506 Nuclear DNA Content Material and Methods. *Plant Molecular Biology Reporter* **9**: 208–218.
- 507 **Ates D, Sever T, Aldemir S, et al. 2016.** Identification QTLs Controlling Genes for Se Uptake  
508 in Lentil Seeds. *PLOS ONE* **11**: e0149210. DOI: 10.1371/journal.pone.0149210.
- 509 **Balanzà V, Martínez-Fernández I, Ferrándiz C. 2014.** Sequential action of FRUITFULL as a  
510 modulator of the activity of the floral regulators SVP and SOC1. *Journal of Experimental Botany*  
511 **65**: 1193–1203.
- 512 **Bhadauria V, Ramsay L, Bett KE, Banniza S. 2017.** QTL mapping reveals genetic  
513 determinants of fungal disease resistance in the wild lentil species *Lens ervoides*. *Scientific*  
514 *Reports* **7**: 3231. DOI: 10.1038/s41598-017-03463-9.
- 515 **BlüMel M, Dally N, Jung C. 2015.** Flowering time regulation in crops-what did we learn from  
516 Arabidopsis? *Current Opinion in Biotechnology* **32**: 121–129.
- 517 **Bolger AM, Lohse M, Usadel B. 2014.** Trimmomatic: a flexible trimmer for Illumina sequence  
518 data. *Bioinformatics* **30**: 2114–2120.
- 519 **Bouchet S, Servin B, Bertin P, et al. 2013.** Adaptation of Maize to Temperate Climates: Mid-  
520 Density Genome-Wide Association Genetics and Diversity Patterns Reveal Key Genomic  
521 Regions, with a Major Contribution of the Vgt2 (ZCN8) Locus. *PLoS ONE* **8**: e71377. DOI:  
522 10.1371/journal.pone.0071377.
- 523 **Broman KW, Wu H, Saunak Sen ´, Churchill GA, Sen S, Churchill GA. 2003.** R/qtl: QTL  
524 mapping in experimental crosses. *Bioinformatics Application Note* **19**: 889–890.

- 525 **Calixto CPG, Guo W, James AB, et al. 2018.** Rapid and dynamic alternative splicing impacts  
526 the arabidopsis cold response transcriptome. *Plant Cell* **30**: 1424–1444.
- 527 **Casal JJ. 2013.** Photoreceptor Signaling Networks in Plant Responses to Shade. *Annual Review*  
528 *of Plant Biology* **64**: 403–427.
- 529 **Chen D, Yan W, Fu LY, Kaufmann K. 2018.** Architecture of gene regulatory networks  
530 controlling flower development in *Arabidopsis thaliana*. *Nature Communications* **9**: 1–13.
- 531 **Cruz-Izquierdo S, Avila CM, Satovic Z, et al. 2012.** Comparative genomics to bridge *Vicia*  
532 *fabia* with model and closely-related legume species: stability of QTLs for flowering and yield-  
533 related traits. *Theoretical and Applied Genetics* **125**: 1767–1782.
- 534 **Danecek P, Auton A, Abecasis G, et al. 2011.** The variant call format and VCFtools.  
535 *Bioinformatics Application Note* **27**: 2156–2158.
- 536 **Dreni L, Zhang D. 2016.** Flower development: The evolutionary history and functions of the  
537 AGL6 subfamily MADS-box genes. *Journal of Experimental Botany* **67**: 1625–1638.
- 538 **Erskine W, Muehlbauer FJ, Short RW, et al. 1990.** Stages of Development in Lentil.  
539 *Experimental Agriculture* **26**: 297.
- 540 **Fedoruk MJ, Vandenberg A, Bett KE. 2013.** Quantitative Trait Loci Analysis of Seed Quality  
541 Characteristics in Lentil using Single Nucleotide Polymorphism Markers. *The Plant Genome* **6**:  
542 DOI: 10.3835/plantgenome2013.05.0012.
- 543 **Fratini R, Durán Y, García P, Pérez De La Vega M. 2007.** Identification of quantitative trait  
544 loci (QTL) for plant structure, growth habit and yield in lentil. *Spanish Journal of Agricultural*  
545 *Research* **5**: 348–356.
- 546 **Fudge JB, Lee RH, Laurie RE, et al. 2018.** *Medicago truncatula* SOC1 Genes Are Up-regulated  
547 by Environmental Cues That Promote Flowering. *Frontiers in Plant Science* **9**: 496. DOI:  
548 10.3389/fpls.2018.00496.

- 549 **Galvão VC, Fiorucci AS, Trevisan M, et al. 2019.** PIF transcription factors link a neighbor  
550 threat cue to accelerated reproduction in Arabidopsis. *Nature Communications* **10**: 1–10.
- 551 **Gol L, Tomé F, Von Korff M. 2017.** Floral transitions in wheat and barley: Interactions between  
552 photoperiod, abiotic stresses, and nutrient status. *Journal of Experimental Botany* **68**: 1399–1410.
- 553 **Grabherr MG, Haas BJ, Yassour M, et al. 2011.** Trinity-Full-length transcriptome assembly  
554 from RNA-Seq data without a reference genome. *Nature biotechnology* **29**: 644–52.
- 555 **Guo W, Tzioutziou N, Stephen G, et al. 2019.** 3D RNA-seq - a powerful and flexible tool for  
556 rapid and accurate differential expression and alternative splicing analysis of RNA-seq data for  
557 biologists. *bioRxiv*: DOI: <https://doi.org/10.1101/656686>.
- 558 **Hartmann U, Höhmann S, Nettesheim K, Wisman E, Saedler H, Huijser P. 2000.** Molecular  
559 cloning of SVP: A negative regulator of the floral transition in Arabidopsis. *Plant Journal* **21**:  
560 351–360.
- 561 **Hecht V, Foucher F, Ferrándiz C, et al. 2005.** Conservation of Arabidopsis Flowering Genes in  
562 Model Legumes. *Plant Physiology* **137**: 1420–1434.
- 563 **Hecht V, Laurie RE, Vander Schoor JK, et al. 2011.** The pea GIGAS gene is a FLOWERING  
564 LOCUS T homolog necessary for graft-transmissible specification of flowering but not for  
565 responsiveness to photoperiod. *The Plant cell* **23**: 147–61.
- 566 **Higgins JA, Bailey PC, Laurie DA. 2010.** Comparative Genomics of Flowering Time Pathways  
567 Using *Brachypodium distachyon* as a Model for the Temperate Grasses. *PLoS ONE* **5**: e10065.  
568 DOI:10.1371/journal.pone.0010065.
- 569 **Hori K, Matsubara · Kazuki, Yano M. 2016.** Genetic control of flowering time in rice:  
570 integration of Mendelian genetics and genomics. *Theoretical and Applied Genetics* **129**: 2241–  
571 2252.
- 572 **Horvath DP, Hansen SA, Moriles-Miller JP, et al. 2015.** RNAseq reveals weed-induced PIF3-



573 like as a candidate target to manipulate weed stress response in soybean. *New Phytologist* **207**:  
574 196–210.

575 **Jaudal M, Wen J, Mysore KS, Putterill J. 2020.** Medicago PHYA promotes flowering,  
576 primary stem elongation and expression of flowering time genes in long days. *BMC Plant*  
577 *Biology* **20**: 329.

578 **Jiménez-Gómez JM, Wallace AD, Maloof JN. 2010.** Network Analysis Identifies ELF3 as a  
579 QTL for the Shade Avoidance Response in Arabidopsis. *PLoS Genetics* **6**: e1001100.

580 **Jung C, Müller AE. 2009.** Flowering time control and applications in plant breeding. *Trends in*  
581 *Plant Science* **14**: 563–573.

582 **Kami C, Lorrain S, Hornitschek P, Fankhauser C. 2010.** Light-Regulated Plant Growth and  
583 Development. *Current topics in Developmental Biology* **91**: 29–66.

584 **Kim MY, Kang YJ, Lee T, Lee S-H. 2013.** Divergence of Flowering-Related Genes in Three  
585 Legume Species. *The Plant Genome* **6**: DOI: 10.3835/plantgenome2013.03.0008.

586 **Kosambi DD. 1943.** The estimation of map distance from recombination values. *Annals of*  
587 *Eugenics* **12**: 172–175.

588 **Ladizinsky G. 1979.** The origin of lentil and its wild genepool. *Euphytica* **28**: 179–187.

589 **Langmead B, Salzberg SL. 2012.** Fast gapped-read alignment with Bowtie 2. *Nature Methods*  
590 **9**: 357–360.

591 **Laurie RE, Diwadkar P, Jaudal M, et al. 2011.** The Medicago FLOWERING LOCUS T  
592 Homolog, MtFTa1, Is a Key Regulator of Flowering Time 1. *Plant Physiology* **156**: 2207–2224.

593 **Lee J, Lee I. 2010.** Regulation and function of SOC1, a flowering pathway integrator. *Journal of*  
594 *Experimental Botany* **61**: 2247–2254.

595 **Leijten W, Koes R, Roobeek I, Frugis G. 2018.** Translating flowering time from arabidopsis  
596 thaliana to brassicaceae and asteraceae crop species. *Plants* **7**: 111. doi: 10.3390/plants7040111.

- 597 **Li H, Handsaker B, Wysoker A, et al. 2009.** The Sequence Alignment/Map format and  
598 SAMtools. *Bioinformatics Application Note* **25**: 2078–2079.
- 599 **Li D, Liu C, Shen L, et al. 2008.** A Repressor Complex Governs the Integration of Flowering  
600 Signals in Arabidopsis. *Developmental Cell* **15**: 110–120.
- 601 **Lin X, Liu B, Weller JL, Abe J, Kong F. 2020.** Molecular mechanisms for the photoperiodic  
602 regulation of flowering in soybean. *Journal of Integrative Plant Biology*: jipb.13021.
- 603 **Liu C, Fan B, Cao Z, et al. 2016.** Development of a high-density genetic linkage map and  
604 identification of flowering time QTLs in adzuki bean (*Vigna angularis*). *Scientific Reports* **6**:  
605 39523. DOI: 10.1038/srep39523.
- 606 **Livak KJ, Schmittgen TD. 2001.** Analysis of Relative Gene Expression Data Using Real-Time  
607 Quantitative PCR and the  $2^{-\Delta\Delta CT}$  Method. *Methods* **25**: 402–408.
- 608 **Mayer MS, Soltis PS. 1994.** Chloroplast DNA phylogeny of Lens (Leguminosae): origin and  
609 diversity of the cultivated lentil. *Theoretical and Applied Genetics: International Journal of*  
610 *Plant Breeding Research* **87**: 773–781.
- 611 **McCouch SR, Cho YG, Yato M, et al. 1997.** Report on QTL nomenclature. *Rice Genetics*  
612 *Newsletter* **14**: 11–13.
- 613 **Meng L, Li H, Zhang L, Wang J. 2015.** QTL IciMapping: Integrated software for genetic  
614 linkage map construction and quantitative trait locus mapping in biparental populations. *The*  
615 *Crop Journal* **3**: 269–283.
- 616 **Myles C, Wayne M. 2008.** *Quantitative Trait Locus (QTL) Analysis*.  
617 <https://www.nature.com/scitable/topicpage/quantitative-trait-locus-qtal-analysis-53904/>. 6 Jun.  
618 2020.
- 619 **Nelson MN, Książkiewicz M, Rychel S, et al. 2017.** The loss of vernalization requirement in  
620 narrow-leaved lupin is associated with a deletion in the promoter and de-repressed expression of a

- 621 Flowering Locus T ( FT ) homologue. *New Phytologist* **213**: 220–232.
- 622 **Ortega R, Hecht VFG, Freeman JS, et al. 2019.** Altered Expression of an FT Cluster Underlies  
623 a Major Locus Controlling Domestication-Related Changes to Chickpea Phenology and Growth  
624 Habit. *Frontiers in Plant Science* **10**: 824. DOI: 10.3389/fpls.2019.00824.
- 625 **Van Os H, Stam P, Visser RGF, Van Eck HJ. 2005.** RECORD: A novel method for ordering  
626 loci on a genetic linkage map. *Theoretical and Applied Genetics* **112**: 30–40.
- 627 **Van Oss H, Aron Y, Ladizinsky G. 1997.** Chloroplast DNA variation and evolution in the  
628 genus *Lens* mill. *Theoretical and Applied Genetics* **94**: 452–457.
- 629 **Ouellette LA, Reid RW, Blanchard SG, Brouwer CR, Stegle O. 2018.** LinkageMapView-  
630 rendering high-resolution linkage and QTL maps (O Stegle, Ed.). *Bioinformatics* **34**: 306–307.
- 631 **Patro R, Duggal G, Love MI, Irizarry RA, Kingsford C. 2017.** Salmon provides fast and bias-  
632 aware quantification of transcript expression. *Nature Methods* **14**: 417–419.
- 633 **Pazos-Navarro M, Ribalta FM, Hurgobin B, Croser JS, Kaur P. 2018.** Gene networks  
634 underlying faster flowering induction in response to far-red light. *bioRxiv*: DOI:  
635 <https://doi.org/10.1101/234161>.
- 636 **Pérez-Vega E, Pañeda A, Rodríguez-Suárez C, Campa A, Giraldez R, Ferreira JJ. 2010.**  
637 Mapping of QTLs for morpho-agronomic and seed quality traits in a RIL population of common  
638 bean (*Phaseolus vulgaris* L.). *Theoretical and Applied Genetics* **120**: 1367–1380.
- 639 **Podder R, Banniza S, Vandenberg A. 2013.** Screening of wild and cultivated lentil germplasm  
640 for resistance to stemphylium blight. *Plant Genetic Resources-Characterization and Utilization*  
641 **11**: 26–35.
- 642 **Putterill J, Laurie R, Macknight R. 2004.** It's time to flower: the genetic control of flowering  
643 time. *BioEssays* **26**: 363–373.
- 644 **Putterill J, Thomson G, Taylor J. 2019.** The transcriptomic response to a short day to long day

645 shift in leaves of the reference legume *Medicago truncatula*. *PeerJ*: 7:e6626  
646 <http://doi.org/10.7717/peerj.6626>.

647 **Putterill JA, Zhang LA, Yeoh CC, et al. 2013.** FT genes and regulation of flowering in the  
648 legume *Medicago truncatula*. *Functional Plant Biology* **40**: 1199–1207.

649 **Quail PH. 2002.** Phytochrome photosensory signalling network. *Nature Reviews Molecular Cell*  
650 *Biology* **3**: 85–93.

651 **R Core Team. 2013.** *R: A language and environment for statistical computing*. [https://www.r-](https://www.r-project.org/)  
652 [project.org/](https://www.r-project.org/). 8 Jun. 2020.

653 **Ramsay L, Koh C, Konkin D, et al. 2019.** *Lens culinaris*- *CDC Redberry Genome Assembly v2*.  
654 <https://knowpulse.usask.ca/genome-assembly/Lcu.2RBY>.

655 **Ridge S, Deokar A, Lee R, et al. 2017.** The Chickpea Early Flowering 1 (Efl1) Locus Is an  
656 Ortholog of *Arabidopsis* ELF3. *Plant physiology* **175**: 802–815.

657 **Roux F, Touzet P, Cuguen JL, Le Corre V. 2006.** How to be early flowering: an evolutionary  
658 perspective. *Trends in Plant Science* **11**: 375–381.

659 **Sarker A, Erskine W, Sharma B, Tyagi MC. 1999.** Inheritance and linkage relationship of  
660 days to flower and morphological loci in lentil (*Lens culinaris* Medikus subsp. *culinaris*). *Journal*  
661 *of Heredity* **90**: 270–275.

662 **Smith H, Whitelam GC. 1997.** The shade avoidance syndrome: multiple responses mediated by  
663 multiple phytochromes. *Plant, Cell and Environment* **20**: 840–844.

664 **Song YH, Shim JS, Kinmonth-Schultz HA, Imaizumi T. 2015.** Photoperiodic Flowering: Time  
665 Measurement Mechanisms in Leaves. *Annu. Rev. Plant Biol* **66**: 441–64.

666 **Sudheesh S, Rodda MS, Davidson J, et al. 2016.** SNP-Based Linkage Mapping for Validation  
667 of QTLs for Resistance to *Ascochyta* Blight in Lentil. *Frontiers in plant science* **7**: 1604. DOI:  
668 10.3389/fpls.2016.01604.

- 669 **Tullu A, Tar'an B, Warkentin T, Vandenberg A. 2008.** Construction of an Intraspecific  
670 Linkage Map and QTL Analysis for Earliness and Plant Height in Lentil. *Crop Science* **48**: 2254.
- 671 **Upadhyaya HD, Bajaj D, Das S, et al. 2015.** A genome-scale integrated approach aids in  
672 genetic dissection of complex flowering time trait in chickpea. *Plant Molecular Biology* **89**: 403–  
673 420.
- 674 **Vail S, Strelloff J V, Tullu A, Vandenberg A. 2011.** Field Crops Research Field evaluation of  
675 resistance to *Colletotrichum truncatum* in *Lens culinaris*, *Lens ervoides*, and *Lens ervoides* ×  
676 *Lens culinaris* derivatives. *Field Crops Research* **126**: 145–151.
- 677 **Weller JL, Liew LC, Hecht VFG, et al. 2012.** A conserved molecular basis for photoperiod  
678 adaptation in two temperate legumes. *Proceedings of the National Academy of Sciences* **109**:  
679 21158–21163.
- 680 **Weller JL, Ortega R. 2015.** Genetic control of flowering time in legumes. *Frontiers in plant*  
681 *science* **6**: 207. doi: 10.3389/fpls.2015.00207.
- 682 **von Wettberg EJB, Chang PL, Başdemir F, et al. 2018.** Ecology and genomics of an important  
683 crop wild relative as a prelude to agricultural innovation. *Nature Communications* **9**: 649.
- 684 **Whitelam GC, Devlin PF. 1997.** Roles of different phytochromes in Arabidopsis  
685 photomorphogenesis. *Plant, Cell and Environment* **20**: 752–758.
- 686 **Wickland DP, Hanzawa Y. 2015.** The FLOWERING LOCUS T/TERMINAL FLOWER 1  
687 Gene Family: Functional Evolution and Molecular Mechanisms. *Molecular Plant* **8**: 983–997.
- 688 **Yoo SK, Wu X, Lee JS, Ahn JH. 2011.** *AGAMOUS-LIKE 6* is a floral promoter that negatively  
689 regulates the *FLC/MAF* clade genes and positively regulates *FT* in Arabidopsis. *The Plant*  
690 *Journal* **65**: 62–76.
- 691 **Yuan HY, Saha S, Vandenberg A, Bett KE. 2017.** Flowering and Growth Responses of  
692 Cultivated Lentil and Wild Lens Germplasm toward the Differences in Red to Far-Red Ratio and

693 Photosynthetically Active Radiation. *Frontiers in plant science* **8**: 386. DOI:

694 10.3389/fpls.2017.00386.

695

696

697

698

699

700

701

702

703

704

705 **TABLES**

706

707 Table 1. QTLs controlling flowering time under different light quality environments and flower

708 time sensitivity of a lentil interspecific recombinant inbred line population developed from *L.*

709 *culinaris* cv. Lupa and *L. orientalis* BGE 016880. DTFH - flowering time under high red/far-red

710 light quality environment; DTFL - flowering time under low red/far-red light quality

711 environment, and FTS - flower time sensitivity towards different light quality environments.

|                 | Trait | L | Position | Left CI – Right      | PVE <sup>2</sup>         |                           |                  |     |                  |
|-----------------|-------|---|----------|----------------------|--------------------------|---------------------------|------------------|-----|------------------|
| QTL name        | Name  | G | (cM)     | CI (cM) <sup>1</sup> | Left Marker <sup>1</sup> | Right Marker <sup>1</sup> | LOD <sup>2</sup> | (%) | Add <sup>2</sup> |
| <i>qDTFH-1A</i> | DTFH  | 1 | 154      | 153.5 - 154.5        | Chr1_314467432           | Chr1_314826609            | 12.8             | 7.3 | 2.95             |
| <i>qDTFH-1B</i> | DTFH  | 1 | 675      | 673.5 - 677.5        | Chr1_531417363           | Chr1_531478466            | 4.0              | 1.7 | 1.46             |
| <i>qDTFH-3</i>  | DTFH  | 3 | 929      | 927.5 - 929.5        | Chr3_408832764           | Chr3_412274319            | 15.1             | 9.1 | 3.30             |
| <i>qDTFH-5</i>  | DTFH  | 5 | 607      | 606.5 - 607.5        | Chr5_374745244           | Chr5_360592403            | 6.8              | 3.2 | 1.99             |
| <i>qDTFH-6B</i> | DTFH  | 6 | 19       | 18.5 - 20.5          | Chr6_3105425             | Chr6_2116708              | 14.0             | 8.1 | 3.10             |

|                 |      |   |     |               |                |                |      |      |       |
|-----------------|------|---|-----|---------------|----------------|----------------|------|------|-------|
| <i>qDTFH-6A</i> | DTFH | 6 | 398 | 397.5 - 398.5 | Chr6_306050653 | Chr6_306189556 | 42.0 | 62.9 | -8.80 |
| <i>qDTFL-1</i>  | DTFL | 1 | 188 | 187.5 - 188.5 | Chr1_316264583 | Chr1_332134411 | 9.5  | 7.6  | 1.74  |
| <i>qDTFL-6B</i> | DTFL | 6 | 29  | 27.5 - 29.5   | Chr6_1026902   | Chr6_904559    | 12.6 | 10.9 | 2.09  |
| <i>qDTFL-6C</i> | DTFL | 6 | 260 | 259.5 - 261.5 | Chr6_68502582  | Chr6_201166536 | 15.1 | 14.5 | 2.40  |
| <i>qDTFL-6A</i> | DTFL | 6 | 407 | 406.5 - 407.5 | Chr6_301233901 | Chr6_294069348 | 27.5 | 45.7 | -4.29 |
| <i>qFTS-2</i>   | FTS  | 2 | 913 | 912.5 - 913.5 | Chr2_311687210 | Chr2_311337314 | 4.8  | 7.9  | 0.02  |
| <i>qFTS-3</i>   | FTS  | 3 | 888 | 886.5 - 888.5 | Chr3_402268033 | Chr3_404644546 | 4.3  | 7.2  | 0.02  |
| <i>qFTS-6</i>   | FTS  | 6 | 396 | 394.5 - 396.5 | Chr6_310079803 | Chr6_306019917 | 21.4 | 59.7 | -0.05 |

712 <sup>1</sup> Left, right CI refers to the left and right positions of confidence interval with one-LOD drop from the QTL; Left, right markers

713 refers to the markers at the left, right CI position (cM).

714 <sup>2</sup> LOD: logarithm of odds; PVE: percentage of phenotypic variance explained by the QTL; Add: additive effect of the QTL.

715 Positive or negative additive effect indicates the effect is contributed by allele from *L. culinaris* cv. Lupa or *L. orientalis* BGE

716 016880, respectively.

717

718

719

720

721 Table 2. Flowering DEGs from the contrast set between low red/far-red ratio and high red/far-red

722 ratio for both *L. orientalis* BGE016880 and *L. culinaris* cv. Lupa and possible related QTLs

723 identified from a lentil interspecific RIL population developed from *L. culinaris* cv. Lupa and *L.*

724 *orientalis* BGE 016880. A gene was significantly differentially expressed if it had adjusted p-

725 value < 0.05 and  $|\text{Log}_2\text{FC}| \geq 1$ .

| Gene Name         | Chr # | <i>L. orientalis</i> BGE 016880 |                                  |                | <i>L. culinaris</i> cv. Lupa |                                  |              | associated QTLs                     |
|-------------------|-------|---------------------------------|----------------------------------|----------------|------------------------------|----------------------------------|--------------|-------------------------------------|
|                   |       | Adj.pval <sup>1</sup>           | Log <sub>2</sub> FC <sup>2</sup> | Up.down        | Adj.pval <sup>1</sup>        | Log <sub>2</sub> FC <sup>2</sup> | up.down      |                                     |
| <i>LcAGL6/13d</i> | 1     | 1.12E-09                        | 3.05                             | up-regulated   | 4.06E-05                     | 1.33                             | up-regulated | <i>qDTFH-1A</i> ,<br><i>qDTFL-1</i> |
| <i>LcSPL3a</i>    | 2     | 4.86E-05                        | -2.72                            | down-regulated | 2.16E-03                     | -0.92                            | Non-DEGs     |                                     |
| <i>LcGA20oxC</i>  | 2     | 1.48E-07                        | 3.40                             | up-regulated   | 2.56E-03                     | 1.41                             | up-regulated |                                     |
| <i>LcAGL6/13c</i> | 2     | 2.20E-09                        | 3.91                             | up-regulated   | 1.05E-04                     | 2.53                             | up-regulated |                                     |
| <i>LcGA3oxBC</i>  | 2     | 2.10E-04                        | -1.95                            | down-regulated | 3.11E-02                     | -0.69                            | Non-DEGs     |                                     |
| <i>LcELF4a</i>    | 3     | 6.27E-04                        | 1.84                             | up-regulated   | 5.55E-07                     | 2.93                             | up-regulated |                                     |
| PRR response      | 3     | 3.74E-07                        | 0.92                             | Non-DEGs       | 1.28E-10                     | 1.53                             | up-regulated |                                     |

regulator

|                      |   |          |       |                |          |       |                |                                                                                              |
|----------------------|---|----------|-------|----------------|----------|-------|----------------|----------------------------------------------------------------------------------------------|
| <i>LcGA20oxG</i>     | 3 | 3.97E-07 | 3.58  | up-regulated   | 4.57E-09 | 4.39  | up-regulated   |                                                                                              |
| <i>LcTEMa</i>        | 5 | 1.37E-02 | 1.73  | up-regulated   | 1.80E-03 | 1.83  | up-regulated   |                                                                                              |
| <i>LcSVPb</i>        | 5 | 1.42E-07 | -1.65 | down-regulated | 3.01E-10 | -1.38 | down-regulated |                                                                                              |
| <i>LcFTb1/LcFTb2</i> | 6 | 3.76E-12 | 2.65  | up-regulated   | 2.48E-07 | 4.39  | up-regulated   | <i>qDTFH-6B</i> ,<br><i>qDTFL-6B</i><br><i>qDTFH-6A</i> ,<br><i>qDTFL-6A</i> , <i>qFTS-6</i> |
| <i>LcFTa1</i>        | 6 | 4.66E-03 | 1.62  | up-regulated   | 4.96E-04 | 0.23  | Non-DEGs       |                                                                                              |
| <i>LcPIF6</i>        | 6 | 6.97E-13 | 2.12  | up-regulated   | 2.04E-08 | 2.04  | up-regulated   |                                                                                              |
| <i>LcSOC1b</i>       | 7 | 3.89E-10 | 1.99  | up-regulated   | 1.28E-05 | 1.09  | up-regulated   |                                                                                              |
| <i>LcTOC1a</i>       | 7 | 4.86E-05 | 1.02  | up-regulated   | 8.62E-11 | 1.19  | up-regulated   |                                                                                              |
| <i>LcFULb</i>        | 7 | 1.24E-12 | 1.99  | up-regulated   | 1.60E-14 | 2.29  | up-regulated   |                                                                                              |

726 <sup>1</sup>Adj.pval: FDR adjusted p-value. P-values of multiple testing were adjusted with BENJAMINI HOCHBERG (BH) procedure to  
 727 correct false discovery rate (FDR) (Benjamini and Yekutieli, 2001).

728 <sup>2</sup>Log<sub>2</sub>FC: the  $\square\square\square 2$  fold change of gene abundance based on contrast groups.

729

730

### 731 **FIGURE CAPTION LIST**

732 Fig. 1 Days to flower of individuals from a Lentil interspecific RIL population developed from a  
 733 cross between *L. culinaris* cv. Lupa and *L. orientalis* BGE 016880, grown under light quality  
 734 environments differing in red to far-red ratio (R/FR) (left & middle) and flowering time  
 735 sensitivity to changes in R/FR light quality environment (right). The violin plot outline illustrates  
 736 kernel probability density and the width of the shaded area represents the proportion of the data  
 737 located there. The inner section of the violin plot shows the box plot indicating the median,  
 738 interquartile range and the 95% confidence interval shown by the whiskers. Dots outside the  
 739 boxplot represent the datapoints that are more than 1.5 times the upper quartile.

740



741 Fig. 2 A: Genetic linkage map of a lentil interspecific RIL population developed from a cross  
742 between *L. culinaris* cv. Lupa and *L. orientalis* BGE 016880. Scale bar at the left of the linkage  
743 map is in centimorgan (cM). Bottom color scheme showed the density of markers with a sliding  
744 window of 30 markers for calculation. B: Circular representation of the markers on the genetic  
745 linkage map of the RIL population and their respective positions on *Lens culinaris* reference  
746 genome. The scale on the outer ring for genetic linkage map (LG1-LG6) is cM and for the  
747 reference genome (LcuChr1-LcuChr7) it is million base pairs (Mbp). C: Validation of the map  
748 using pairwise linkage information. Plot shows the estimated recombination fractions and LOD  
749 scores for all pairs of markers after ordering the markers on each linkage group. The  
750 recombination fractions are in the upper left triangle while the LOD scores are in the lower right  
751 triangle. Estimates are plotted as a heat map with dark blue signifying no linkage and yellow  
752 representing tight linkage with low RF and large LOD. The diagonal yellow line indicates good  
753 linkage within each LG. LG2 is the one that is complicated by pseudolinkage of markers from 2  
754 different *L. culinaris* chromosomes.

755  
756 Fig. 3 QTLs identified for flower time under two different light quality environments (a – high  
757 R/FR and b - low R/FR) and flower time sensitivity to this light quality change (c) in a lentil  
758 interspecific RIL population developed from a cross between *L. culinaris* cv. Lupa and *L.*  
759 *orientalis* BGE 016880. The horizontal dashed line on each graph represents the threshold LOD  
760 score for QTL identification after 1000 permutation test.

761  
762 Fig. 4. Alluvial plots showing up-regulated genes (red flow), non-differentially expressed genes  
763 (green flow) and down-regulated genes (blue flow) from the contrast between low R/FR and high

764 R/FR from five different growth stages for *L. orientalis* BGE016880 (a) and *L. culinaris* cv. Lupa  
765 (b).

766  
767 Fig. 5 Relative expression of flowering-related genes from the samples grown at low red/far-red  
768 ratio and high red/far-red ratio from five different growth stages for both *L. orientalis*  
769 BGE016880 and *L. culinaris* cv. Lupa assessed using RT-qPCR. Sample collection started 2  
770 weeks after emergence and continued once a week for 5 weeks. Samples were taken at the same  
771 time of the day for each collection. Actin was used as the reference gene for the normalization of  
772 the data and the delta-delta CT method was adopted to derive the relative gene expression value  
773  $2^{-\Delta\Delta CT}$  using samples from T1 stage at low R/FR light quality environment as reference samples.  
774 Values represent the mean of biological replicates with their corresponding standard deviation.

775  
776 Fig. 6. A model for the role and interactions of lentil flower genes under low R/FR light quality  
777 environment. This model summarizes the major results from this study and the hypothetical  
778 interactions are based on previous network studies on Arabidopsis and other legumes (Putterill *et*  
779 *al.*, 2013; BlüMel *et al.*, 2015; Weller and Ortega, 2015; Chen *et al.*, 2018). Arrows indicate a  
780 promoting interaction, a T-end indicates an inhibiting interaction, and a straight line marks an  
781 interaction with no firm direction. Gene name shown in blue (*LcFTa1*) was a DEG only in *L.*  
782 *orientalis* BGE 016880.

783

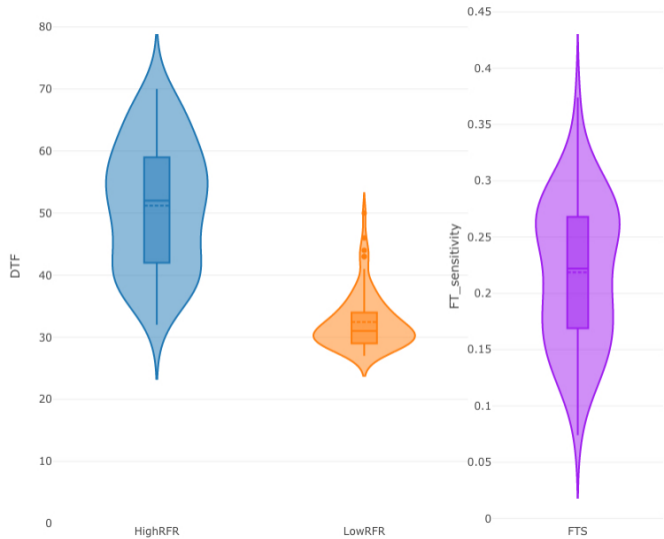

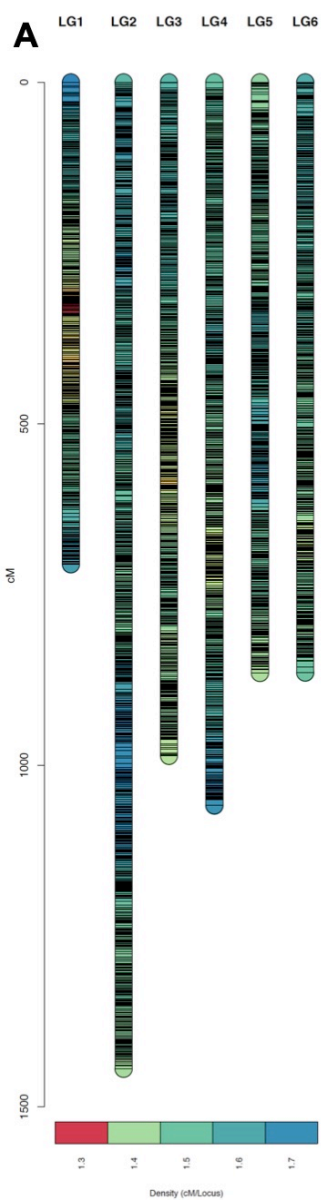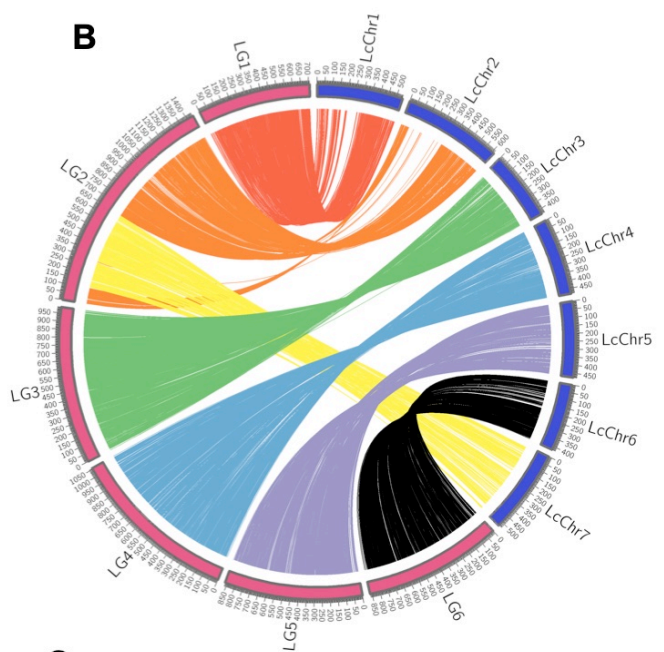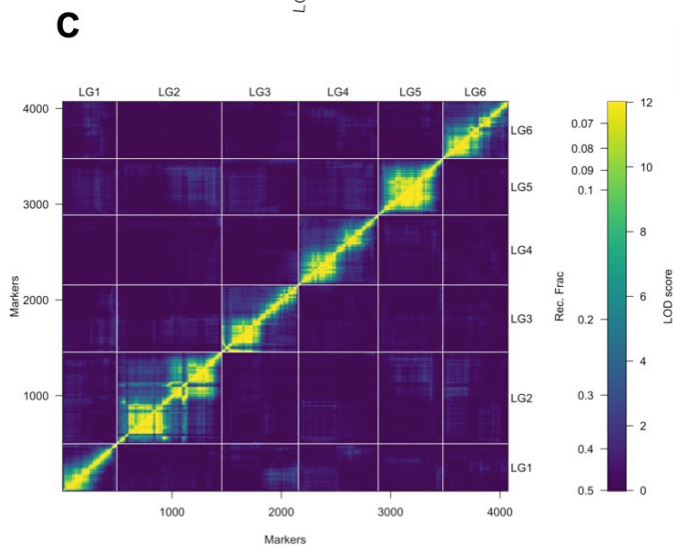

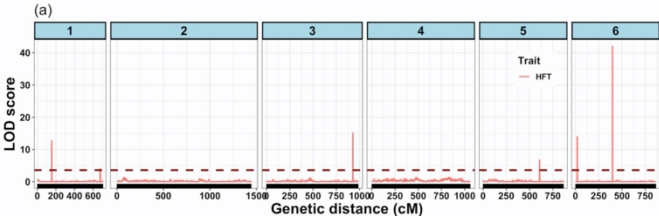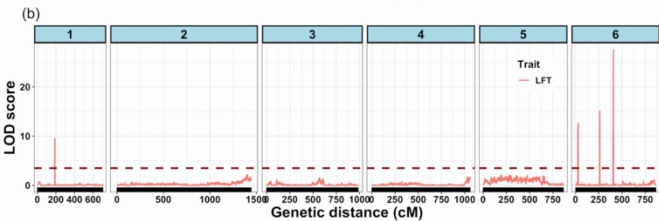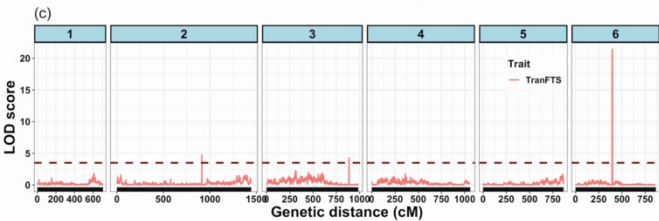

(a) *L. orientalis* BGE 016880

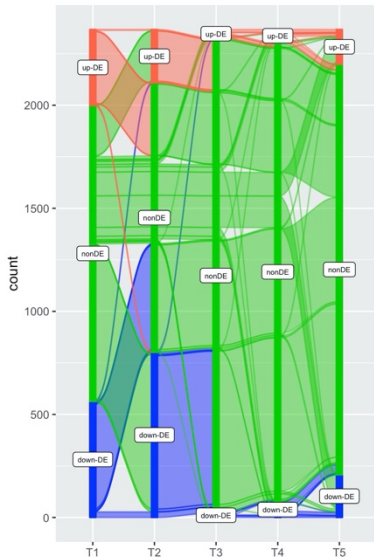

(b) *L. culinaris* Lupa

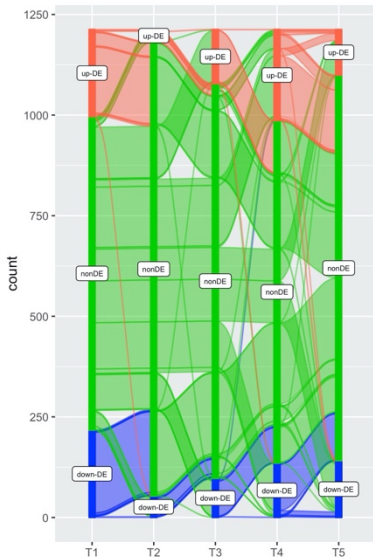

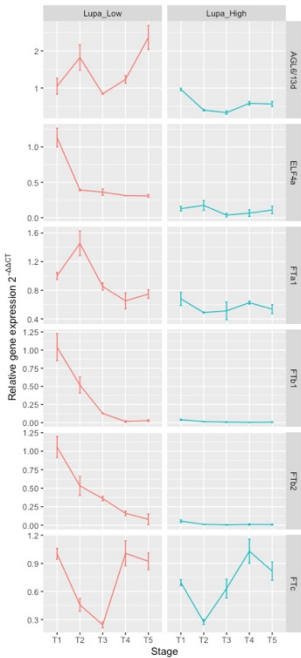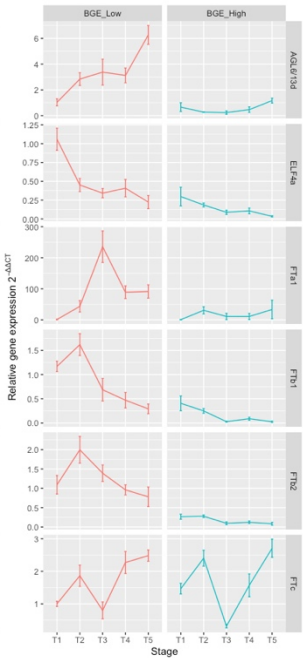

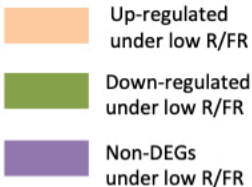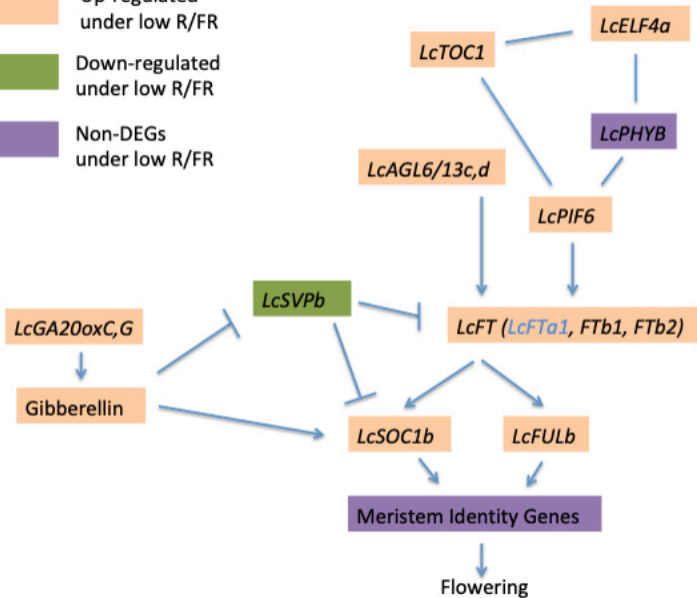

Source: https://biorxiv.org/content/10.1101/2021.02.14.429948v1.full.pdf
